# Supplementary material for: Moxibustion for the treatment of pressure ulcers: study protocol for a pilot, multicentre, randomised controlled trial
Source: PubMed Central journal article supplement — BMJ Open. 2014 Dec 30;4(12):e006423. doi: 10.1136/bmjopen-2014-006423 (PMC4281529; doi:10.1136/bmjopen-2014-006423), 2014-12-30
Supplement: bmjopen-2014-006423.reviewer_comments.pdf [file bmjopen-2014-006423.reviewer_comments.pdf]

## PEER REVIEW HISTORY

BMJ Open publishes all reviews undertaken for accepted manuscripts. Reviewers are asked to complete a checklist review form (<http://bmjopen.bmj.com/site/about/resources/checklist.pdf>) and are provided with free text boxes to elaborate on their assessment. These free text comments are reproduced below.

This paper was submitted to the JECH but declined for publication following peer review. The authors addressed the reviewers' comments and submitted the revised paper to BMJ Open. The paper was subsequently accepted for publication at BMJ Open.

## ARTICLE DETAILS

|                            |                                                                                                                        |
|----------------------------|------------------------------------------------------------------------------------------------------------------------|
| <b>TITLE (PROVISIONAL)</b> | Moxibustion for the treatment of pressure ulcers: Study protocol for a pilot, multicenter, randomized controlled trial |
| <b>AUTHORS</b>             | Sun, Zhongren; Zhang, Qinrong; Yue, Jinhuan; Li, Chaoran                                                               |

This article was not externally reviewed at BMJ Open. Protocols that have been independently assessed prior to submission to BMJ Open are usually fast-tracked to publication on the grounds that further substantial changes will not be possible. This independent assessment will usually be external, independent review for both a substantial grant award from a non commercial or government funder and ethics approval.
